# Supplementary material for: Comprehensive Genetic Analyses of Inherited Peripheral Neuropathies in Japan: Making Early Diagnosis Possible
Source: MDPI journal article supplement (doi:10.3390/biomedicines10071546), 2022-06-29
Supplement: s1 [file s1]

## Supporting information

**Figure S1.** RP-PCR of each repeat expansion genotypes in *RFC1* and MLPA of *MPZ* and *GJB1*.

Multi-type bi-allelic *RFC1* repeat expansions, including [(AAGGG)exp/(AAGGG)exp] (patient 2), [(AAGGG)exp/(ACAGG)exp] (patient 8), [(ACAGG)exp/(ACAGG)exp] (patient 12), [(AAGGG)exp/(AAAGG)<sub>13</sub>(AAGGG)exp] (patient 17), and [(ACAGG)exp/(AAAGG)<sub>12</sub>(AAGGG)exp] (patient 18). MLPA analysis reveals a duplication of *MPZ* exon 2–6 (1 case) and a deletion of *GJB1* exon 2 (2 cases).

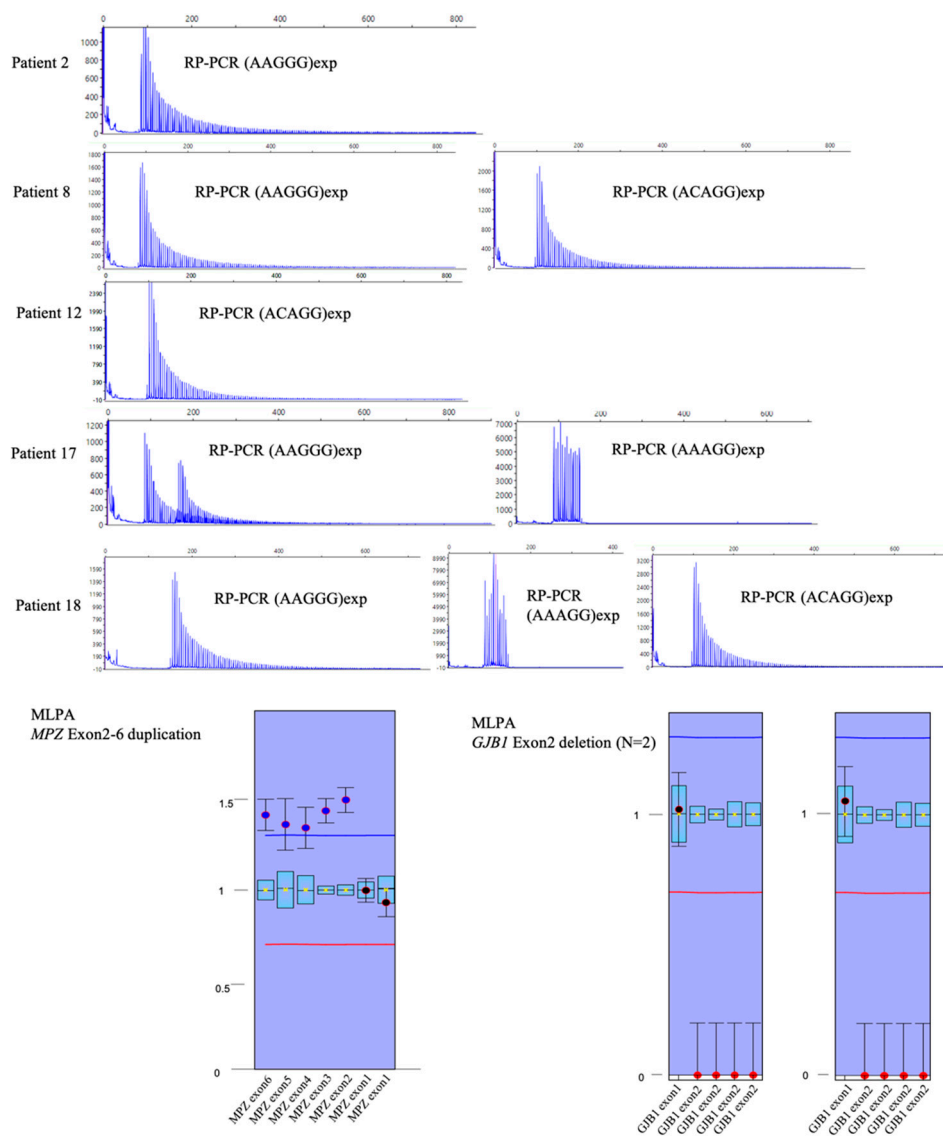

**Table S1.** Targeted IPN-related gene panels for DNA microarray and NGS.

|                                                           |                   |               |                  |                |                 |                  |               |                |
|-----------------------------------------------------------|-------------------|---------------|------------------|----------------|-----------------|------------------|---------------|----------------|
| Targeted 28 genes of Microarray Chip sequencing 2007-2012 | <i>AARS1</i>      | <i>APTX</i>   | <i>DNM2</i>      | <i>EGR2</i>    | <i>GAN1</i>     | <i>GARS</i>      | <i>GDAP1</i>  | <i>GJB1</i>    |
|                                                           | <i>HSPB1</i>      | <i>HSPB8</i>  | <i>LITAF</i>     | <i>LMNA</i>    | <i>LMNA</i>     | <i>MFN2</i>      | <i>MPZ</i>    | <i>MTMR2</i>   |
|                                                           | <i>NDRG1</i>      | <i>NEFL</i>   | <i>PMP22</i>     | <i>PRX</i>     | <i>RAB7</i>     | <i>SBF2</i>      | <i>SETX</i>   | <i>SH3TC2</i>  |
|                                                           | <i>SLC12A6</i>    | <i>SOX10</i>  | <i>TDP1</i>      | <i>YARS1</i>   |                 |                  |               |                |
| Targeted panel using Miseq (60 genes) 2012-2014           | <i>AARS1</i>      | <i>APTX</i>   | <i>ARHGEF10</i>  | <i>DHH</i>     | <i>DNM2</i>     | <i>EGR2</i>      | <i>FGD4</i>   | <i>FIG4</i>    |
|                                                           | <i>GAN</i>        | <i>GARS</i>   | <i>GDAP1</i>     | <i>GJB1</i>    | <i>HARS</i>     | <i>HK1</i>       | <i>HOXD10</i> | <i>HSPB1</i>   |
|                                                           | <i>HSPB8</i>      | <i>KARS</i>   | <i>LITAF</i>     | <i>LMNA</i>    | <i>MARS</i>     | <i>MED25</i>     | <i>MFN2</i>   | <i>MPZ</i>     |
|                                                           | <i>MTMR2</i>      | <i>NDRG1</i>  | <i>NEFL</i>      | <i>PMP22</i>   | <i>PRPS1</i>    | <i>PRX</i>       | <i>RAB7A</i>  | <i>SBF2</i>    |
|                                                           | <i>SETX</i>       | <i>SH3TC2</i> | <i>SLC12A6</i>   | <i>SOX10</i>   | <i>TDP1</i>     | <i>TRPV4</i>     | <i>TTR</i>    | <i>YARS</i>    |
|                                                           | 20 candidate gene |               |                  |                |                 |                  |               |                |
| Targeted panel using Ion Proton (72 genes) 2014-2021      | <i>AARS</i>       | <i>APTX</i>   | <i>ARHGEF10</i>  | <i>BSCL2</i>   | <i>COA7</i>     | <i>DCAF8</i>     | <i>DCTN1</i>  | <i>DHH</i>     |
|                                                           | <i>DHTKD1</i>     | <i>DNM2</i>   | <i>DYNC1H1</i>   | <i>EGR2</i>    | <i>FBLN5</i>    | <i>FBXO38</i>    | <i>FGD4</i>   | <i>FIG4</i>    |
|                                                           | <i>GALC</i>       | <i>GAN</i>    | <i>GARS</i>      | <i>GDAP1</i>   | <i>GJB1</i>     | <i>GJB3</i>      | <i>GNB4</i>   | <i>HARS</i>    |
|                                                           | <i>HK1</i>        | <i>HOXD10</i> | <i>HSPB1</i>     | <i>HSPB3</i>   | <i>HSPB8</i>    | <i>IGHMBP2</i>   | <i>INF2</i>   | <i>KARS</i>    |
|                                                           | <i>KIF1A</i>      | <i>LITAF</i>  | <i>LMNA</i>      | <i>LRSAM1</i>  | <i>MARS</i>     | <i>MED25</i>     | <i>MFN2</i>   | <i>MME</i>     |
|                                                           | <i>MPZ</i>        | <i>MTMR2</i>  | <i>NDRG1</i>     | <i>NEFL</i>    | <i>PDK3</i>     | <i>PLEKHG5</i>   | <i>PMP22</i>  | <i>PRPS1</i>   |
|                                                           | <i>PRX</i>        | <i>RAB7A</i>  | <i>REEP1</i>     | <i>SACS</i>    | <i>SBF1</i>     | <i>SBF2</i>      | <i>SETX</i>   | <i>SH3TC2</i>  |
|                                                           | <i>SLC12A6</i>    | <i>SLC5A7</i> | <i>SOX10</i>     | <i>SURF1</i>   | <i>TDP1</i>     | <i>TFG</i>       | <i>TRIM2</i>  | <i>TRPV4</i>   |
|                                                           | <i>TTR</i>        | <i>YARS</i>   | 6 candidate gene |                |                 |                  |               |                |
| Targeted panel using Ion Proton (103 genes) 2022-         | <i>AARS1</i>      | <i>ABHD12</i> | <i>AIFM1</i>     | <i>APTX</i>    | <i>ARHGEF10</i> | <i>ATL1</i>      | <i>ATL3</i>   | <i>ATP1A1</i>  |
|                                                           | <i>BAG3</i>       | <i>BICD2</i>  | <i>BSCL2</i>     | <i>COA3</i>    | <i>COA7</i>     | <i>COX6A1</i>    | <i>DCTN1</i>  | <i>DHTKD1</i>  |
|                                                           | <i>DNAJB2</i>     | <i>DNM2</i>   | <i>DNMT1</i>     | <i>DRP2</i>    | <i>DYNC1H1</i>  | <i>EGR2</i>      | <i>FBLN5</i>  | <i>FGD4</i>    |
|                                                           | <i>FIG4</i>       | <i>FUS</i>    | <i>GALC</i>      | <i>GAN</i>     | <i>GARS1</i>    | <i>GDAP1</i>     | <i>GJB1</i>   | <i>GJB3</i>    |
|                                                           | <i>GNB4</i>       | <i>GNE</i>    | <i>HARS1</i>     | <i>HINT1</i>   | <i>HOXD10</i>   | <i>HSPB1</i>     | <i>HSPB3</i>  | <i>HSPB8</i>   |
|                                                           | <i>IGHMBP2</i>    | <i>INF2</i>   | <i>KARS1</i>     | <i>KIF1A</i>   | <i>LAMA2</i>    | <i>LITAF</i>     | <i>LMNA</i>   | <i>LRSAM1</i>  |
|                                                           | <i>MARS1</i>      | <i>MCM3AP</i> | <i>MFN2</i>      | <i>MME</i>     | <i>MORC2</i>    | <i>MPV17</i>     | <i>MPZ</i>    | <i>MTMR2</i>   |
|                                                           | <i>NAGLU</i>      | <i>NDRG1</i>  | <i>NEFH</i>      | <i>NEFL</i>    | <i>NTRK1</i>    | <i>PDK3</i>      | <i>PDXK</i>   | <i>PLEKHG5</i> |
|                                                           | <i>PMP2</i>       | <i>PMP22</i>  | <i>PNKP</i>      | <i>POLG</i>    | <i>POLR3B</i>   | <i>PRDM12</i>    | <i>PRPS1</i>  | <i>PRX</i>     |
|                                                           | <i>RAB7A</i>      | <i>REEP1</i>  | <i>SACS</i>      | <i>SBF1</i>    | <i>SBF2</i>     | <i>SCN11A</i>    | <i>SCN9A</i>  | <i>SCO2</i>    |
|                                                           | <i>SETX</i>       | <i>SH3TC2</i> | <i>SIGMAR1</i>   | <i>SLC12A6</i> | <i>SLC25A46</i> | <i>SLC52A3</i>   | <i>SLC5A7</i> | <i>SOD1</i>    |
|                                                           | <i>SORD</i>       | <i>SPG11</i>  | <i>SPTLC1</i>    | <i>SPTLC2</i>  | <i>SURF1</i>    | <i>TDP1</i>      | <i>TFG</i>    | <i>TRPV4</i>   |
|                                                           | <i>TTR</i>        | <i>VCP</i>    | <i>WARS1</i>     | <i>WNK1</i>    | <i>YARS1</i>    | 2 candidate gene |               |                |

**Table S2.** Primers of flanking and repeat-primed PCR for *RFC1* repeat expansion analyses

| Protocol          | Primer (5'-3')                                                                                                                                                                                                                                                                                                                                          |
|-------------------|---------------------------------------------------------------------------------------------------------------------------------------------------------------------------------------------------------------------------------------------------------------------------------------------------------------------------------------------------------|
| Flanking PCR      | Forward: TCAAGTGATACTCCAGCTACACCGTTGC<br>Reverse: CAGCATTGTGGGAGACAGGCCAATCACT                                                                                                                                                                                                                                                                          |
| Repeat-primed PCR | <b>AAGGG (pathogenic)</b><br>Forward: [6FAM]TCAAGTGATACTCCAGCTACACCGT<br>Anchor: CAGGAAACAGCTATGACC<br>Reverse: CAGGAAACAGCTATGACCGGGAAGGGAAGGGAAGGGAA                                                                                                                                                                                                  |
|                   | <b>ACAGG (pathogenic)</b><br>Forward: [6FAM]TCAAGTGATACTCCAGCTACACCGT<br>Anchor: CAGGAAACAGCTATGACC<br>Reverse: CAGGAAACAGCTATGACCACAGGACAGGACAGGACAGG                                                                                                                                                                                                  |
|                   | <b>AAAAG (benign)</b><br>Forward: [6FAM]TCAAGTGATACTCCAGCTACACCGT<br>Anchor: CAGGAAACAGCTATGACC<br>Reverse1:<br>CAGGAAACAGCTATGACCAACAGAGCAAGACTCTGTTTCAAAAAAG AAAAGAAAAGAAAAGAAAA<br>Reverse2:<br>CAGGAAACAGCTATGACCAACAGAGCAAGACTCTGTTTCAAAAAAGA AAAGAAAAGAAAAGAAAA<br>Reverse3:<br>CAGGAAACAGCTATGACCAACAGAGCAAGACTCTGTTTCAAAAAGAA AAGAAAAGAAAAGAAAA |
|                   | <b>AAAGG (benign)</b><br>Forward: [6FAM]TCAAGTGATACTCCAGCTACACCGT<br>Anchor: CAGGAAACAGCTATGACC<br>Reverse: CAGGAAACAGCTATGACCGGAAAGGAAAGGAAAGGAAA                                                                                                                                                                                                      |
|                   |                                                                                                                                                                                                                                                                                                                                                         |
|                   |                                                                                                                                                                                                                                                                                                                                                         |
|                   |                                                                                                                                                                                                                                                                                                                                                         |

**Table S3.** Clinical and electrophysiological information of 18 cases with *RFC1* repeat expansion

| Patient                   | Pt 1                   | Pt 2      | Pt 3         | Pt 4   | Pt 5     | Pt 6                   | Pt 7   | Pt 8         | Pt 9         | Pt 10             | Pt 11                  | Pt 12         | Pt 13  | Pt 14  | Pt 15  | Pt 16                  | Pt 17        | Pt 18  |
|---------------------------|------------------------|-----------|--------------|--------|----------|------------------------|--------|--------------|--------------|-------------------|------------------------|---------------|--------|--------|--------|------------------------|--------------|--------|
| <i>RFC1</i> repeat        | (AAGGG) <sub>exp</sub> |           |              |        |          | (AAGGG) <sub>exp</sub> |        |              |              |                   | (ACAGG) <sub>exp</sub> |               |        |        |        | (AAGGG) <sub>exp</sub> |              |        |
|                           | (AAGGG) <sub>exp</sub> |           |              |        |          | (AAGGG) <sub>exp</sub> |        |              |              |                   | (ACAGG) <sub>exp</sub> |               |        |        |        | (AAGGG) <sub>exp</sub> |              |        |
| Onset age                 | 33                     | 40        | 49           | 50     | 0        | 1                      | 72     | 53           | 64           | 10                | 44                     | 65            | 60     | 72     | 71     | 76                     | 25           | 50     |
| Exam age                  | 37                     | 43        | 53           | 70     | 1        | 40                     | 78     | 70           | 76           | 16                | 45                     | 74            | 72     | 74     | 75     | 80                     | 45           | 65     |
| Sex                       | M                      | M         | M            | M      | M        | M                      | M      | M            | M            | M                 | M                      | M             | M      | F      | M      | F                      | M            | F      |
| Genotype                  | S                      | S         | NA           | S      | S        | S                      | S      | S            | R            | S                 | S                      | S/R           | S      | S      | S      | S                      | S            | S      |
| Muscle weakness           | +                      | +         | +            | +      | +        | +                      | +      | +            | +            | +                 | +                      | +             | +      | +      | +      | +                      | +            | +      |
| Upper limb MMT (proximal) | 5                      | 5         | 3-4          | 5      | NA       | NA                     | 4      | 5            | 5            | 4                 | 5                      | 5             | 5      | 5      | 5      | 5                      | 5            | 5      |
| Upper limb MMT (distal)   | 5                      | 5         | 4-5          | 4      | NA       | NA                     | 1      | 4            | 4            | 3                 | 4                      | 5             | 4      | 5      | 3      | 5                      | 4            | 4      |
| Lower limb MMT (proximal) | 5                      | 5         | 3-4          | 5      | NA       | 3                      | 4      | 5            | 5            | 4                 | 5                      | 5             | 4      | 4      | 5      | 5                      | 5            | 5      |
| Lower limb MMT (distal)   | 3                      | 4         | 4-5          | 5      | NA       | 4                      | 0-1    | 4            | 4            | 3                 | 5                      | 4             | 4      | 4      | 4      | 5                      | 4            | 5      |
| Muscle atrophy            | +                      | +         | NA           | +      | —        | NA                     | +      | —            | NA           | +                 | —                      | +             | +      | +      | +      | +                      | +            | +      |
| DTR                       | Decrease               | Decrease  | NA           | Absent | Decrease | Decrease               | Absent | Absent       | Decrease     | Hyper             | Decrease               | Absent        | Absent | Absent | Absent | Absent                 | Normal       | Absent |
| Sensory disturbance       | +                      | +         | +            | +      | NA       | +                      | +      | +            | +            | +                 | +                      | +             | +      | +      | +      | +                      | +            | +      |
| Cerebellar ataxia         | —                      | —         | +            | —      | NA       | NA                     | —      | +            | —            | —                 | —                      | +             | —      | —      | +      | —                      | —            | +      |
| Cerebellar atrophy        | —                      | —         | Mild atrophy | NA     | NA       | NA                     | —      | —            | NA           | NA                | NA                     | +             | —      | NA     | +      | NA                     | —            | —      |
| Vestibular dysfunction    | —                      | —         | NA           | —      | NA       | NA                     | —      | +            | —            | —                 | —                      | NA            | —      | —      | NA     | NA                     | NA           | +      |
| Chronic cough             | —                      | NA        | NA           | NA     | NA       | NA                     | —      | +            | NA           | —                 | —                      | NA            | +      | +      | NA     | NA                     | NA           | NA     |
| Pyramidal sign            | —                      | —         | NA           | —      | —        | —                      | —      | —            | —            | +                 | —                      | —             | —      | —      | —      | —                      | —            | —      |
| Parkinsonism              | —                      | NA        | +            | —      | —        | NA                     | —      | —            | —            | —                 | —                      | —             | —      | —      | —      | —                      | —            | —      |
| Cognitive impairment      | —                      | NA        | NA           | —      | NA       | NA                     | —      | —            | NA           | ADHD              | —                      | NA            | —      | —      | —      | —                      | —            | —      |
| Involuntary movement      | —                      | NA        | NA           | —      | NA       | NA                     | —      | —            | NA           | —                 | —                      | —             | —      | Tremor | —      | —                      | —            | —      |
| Autonomic dysfunction     | —                      | NA        | NB, OH, ED   | —      | NA       | NA                     | —      | Constipation | Constipation | —                 | —                      | —             | —      | —      | —      | OH, NB                 | hypohidrosis | —      |
|                           |                        |           |              |        |          |                        |        | Hypohidrosis | Pollakiuria  | —                 | —                      | —             | —      | —      | —      | —                      | —            | —      |
| Muscle cramp              | +                      | NA        | NA           | NA     | NA       | NA                     | —      | +            | NA           | —                 | —                      | Fasciculation | —      | +      | NA     | NA                     | NA           | —      |
| Creatine Kinase (IU/L)    | 450                    | NA        | 400-2200     | NA     | NA       | 339-700                | 322    | —            | NA           | 27                | —                      | 91            | 385    | 125    | 531    | NA                     | 386          | 85     |
| Other symptom             | —                      | —         | —            | —      | —        | —                      | —      | Epilepsy     | Diplopia     | Neurofibromatosis | —                      | —             | —      | —      | —      | —                      | —            | —      |
| Median MNCV (m/s)         | 57.1/57.9              | 59.2/56.5 | NA           | 55.4   | 37.4     | 56                     | 46     | 49           | 48           | 46.8              | 57                     | 53.3          | 43.7   | 56.4   | 57.5   | Normal                 | 50.6         | 56.5   |
| Median CMAP (mV)          | 9.94/10.5              | 14.7/16.4 | NA           | 5.3    | 7.4      | 11.7                   | 0.3    | 8.6          | 4.52         | NA                | 9.5                    | 5.5           | 8.7    | 3.4    | 4.13   | Normal                 | 6.16         | 8.48   |
| Median SCV (m/s)          | 30.2                   | 54.5/58.8 | NA           | NE     | 46.4     | NA                     | NE     | NE           | 31           | NA                | 39.8                   | NE            | NE     | NE     | NE     | Decrease               | 48           | 58.0   |
| Median SNAP (μV)          | 64                     | 21.4/28.7 | NA           | NE     | 5.1      | NA                     | NE     | NE           | 2            | NA                | 12.8                   | NE            | NE     | NE     | NE     | Decrease               | 0.4          | 2.6    |
| Tibial MNCV (m/s)         | 43.8/42.3              | 47.9/43.6 | NA           | 41.4   | 45.5     | 43                     | 39.5   | 34           | 38           | 38.6              | 47.9                   | 38.0          | 35.8   | 42.1   | 31.1   | Decrease               | 40.2         | 43.8   |
| Tibial CMAP (mV)          | 10.2/6.95              | 20.1/6.9  | NA           | 2.4    | 1        | 7                      | 0.2    | 1.5          | 5.8          | NA                | 8.6                    | 1.2           | 4.1    | 9.5    | 0.49   | Decrease               | 3.2          | 6.15   |
| Sural SCV (m/s)           | 58.8/52.9              | 47.8/49.2 | NA           | NE     | 43.1     | NA                     | NE     | NE           | NE           | NA                | NE                     | NE            | NE     | NE     | NE     | NE                     | NE           | NE     |
| Sural SNAP (μV)           | 7.6/9.3                | 12.9/9.4  | NA           | NE     | 11       | NA                     | NE     | NE           | NE           | NA                | NE                     | NE            | NE     | NE     | NE     | NE                     | NE           | NE     |

M: male; F: female; S: sporadic; R: autosomal recessive; R/S: sporadic or autosomal recessive;

MMT: manual muscle test; NA: not available; DTR: deep tendon reflex; ADHD: attention-deficit

hyperactivity disorder; NB: neurogenic bladder; OH: orthostatic hypotension; ED: erectile

dysfunction; CK: creatine kinase (U/L); MNCV: motor nerve conduction velocity; CMAP:

compound motor action potential; SCV: sensory nerve conduction velocity; SNAP: sensory nerve

action potential; NE: not evoked. Normal range: median CMAP > 3.1 mV; median MCV > 49.6 m/s;

median SNAP > 7.0 μV; median SCV > 47.2 m/s; tibial CMAP > 4.4mV; tibial MCV > 41.7 m/s;

sural SNAP > 5.0 μV; sural SCV > 40.8 m/s; CK (male) 59–248 IU/mL and (female) 41–153 IU/mL.
